# Supplementary material
Source: PubMed Central journal article supplement (PMC6359963)
Supplement: NIHMS1507357-supplement-3.pdf [file NIHMS1507357-supplement-3.pdf]

## Supplemental Tables

**Table S1: Nomenclature used throughout manuscript to describe genetically modified cell lines.**

| <b>Name</b>         | <b>Transfection procedure</b>                                                                   |
|---------------------|-------------------------------------------------------------------------------------------------|
| HT1080.si.CTRL      | siRNA transfection of scrambled control                                                         |
| HT1080.si.HuR       | siRNA transfection against HuR                                                                  |
| BT054.si.CTRL       | siRNA transfection of scrambled control                                                         |
| BT054.si.HuR        | siRNA transfection against HuR                                                                  |
| HT1080.EV           | Plasmid transfection of empty vector                                                            |
| HT1080.HOE          | Plasmid transfection of HuR                                                                     |
| BT054.EV            | Plasmid transfection of empty vector                                                            |
| BT054.HOE           | Plasmid transfection of HuR                                                                     |
| HT1080.HuR(-/-)     | CRISPR/Cas9-mediated knockout of HuR using a guide RNA targeting HuR in HT1080 cells            |
| HT1080.HuR(+/+)     | CRISPR/Cas9- scrambled control in HT1080 cells                                                  |
| HuR(+/+).EV         | Stable overexpression of empty vector in CRISPR/Cas9 scrambled control in HT1080 cells          |
| HuR(+/+).WT.IDH1OE  | Stable overexpression of wild type IDH1 in CRISPR/Cas9 scrambled control in HT1080 cells        |
| HuR(+/+).Mut.IDH1OE | Stable overexpression of mutant IDH1 in CRISPR/Cas9 scrambled control in HT1080 cells           |
| HuR(-/-).EV         | Stable overexpression of empty vector in CRISPR/Cas9 mediated knockout of HuR in HT1080 cells   |
| HuR(-/-).WT.IDH1OE  | Stable overexpression of wild type IDH1 in CRISPR/Cas9 mediated knockout of HuR in HT1080 cells |
| HuR(-/-).Mut.IDH1OE | Stable overexpression of mutant IDH1 in CRISPR/Cas9 mediated knockout of HuR in HT1080 cells    |
