# Supplementary material
Source: PubMed Central journal article supplement (PMC6359963)

**A**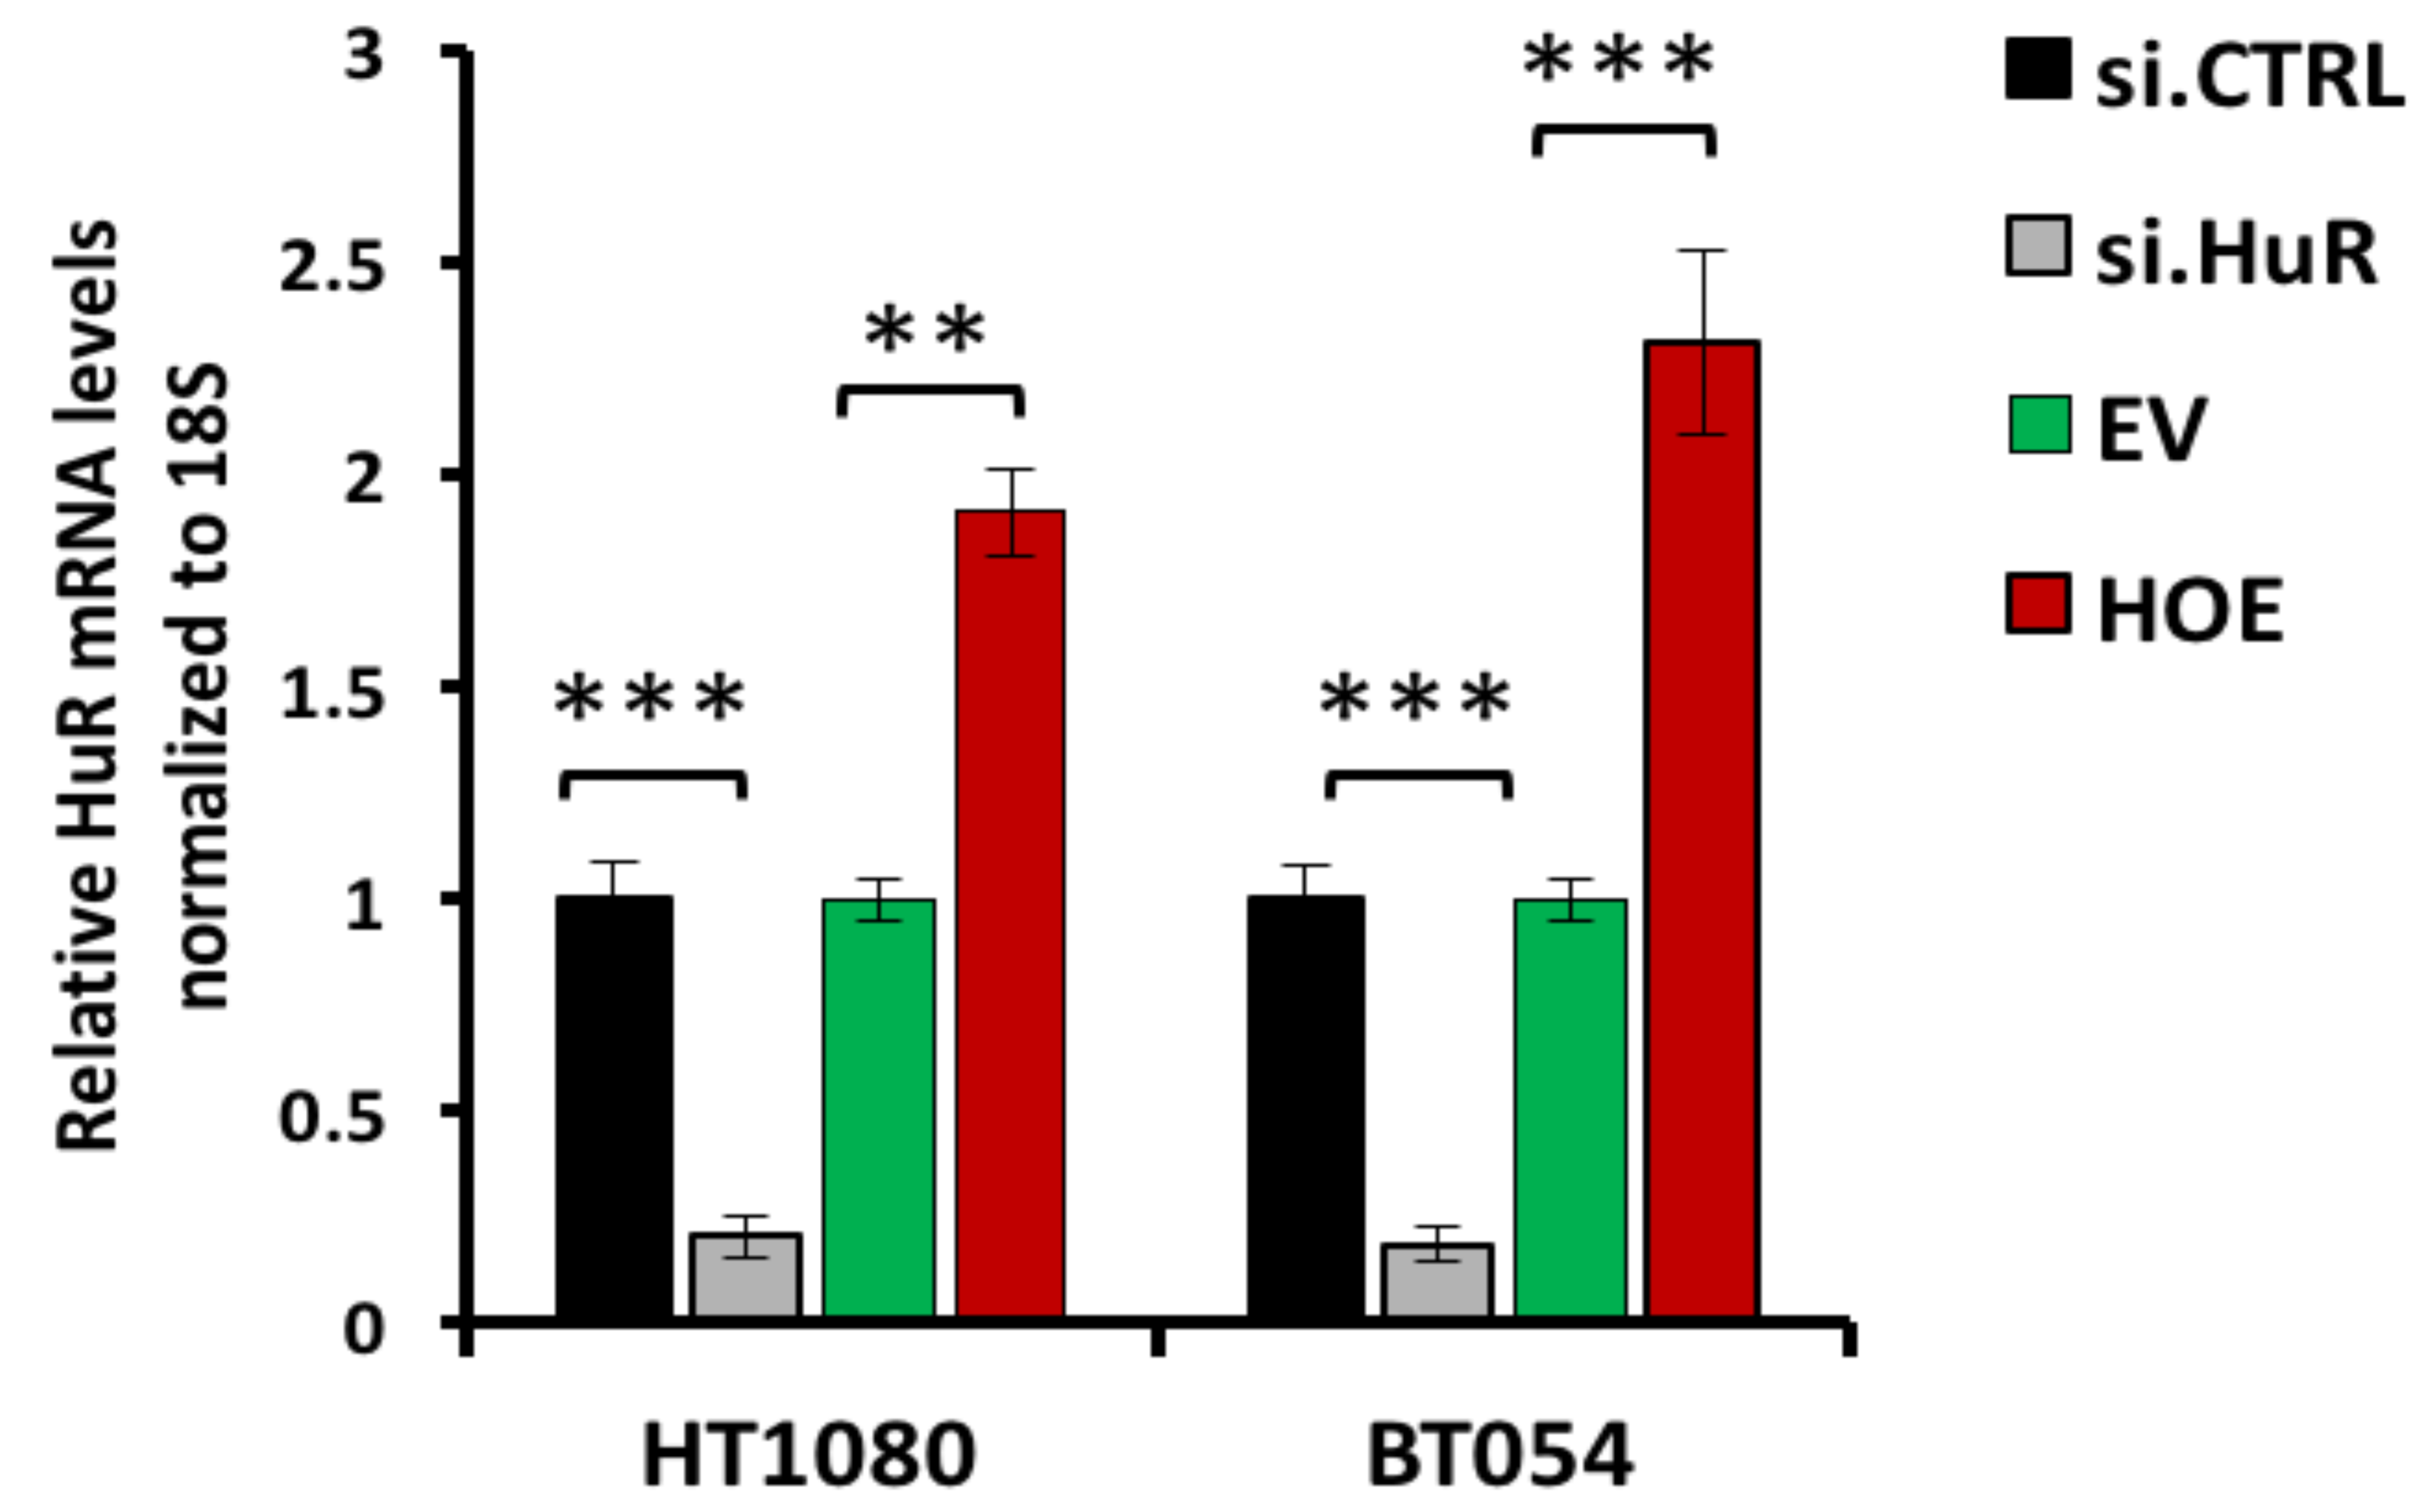**B**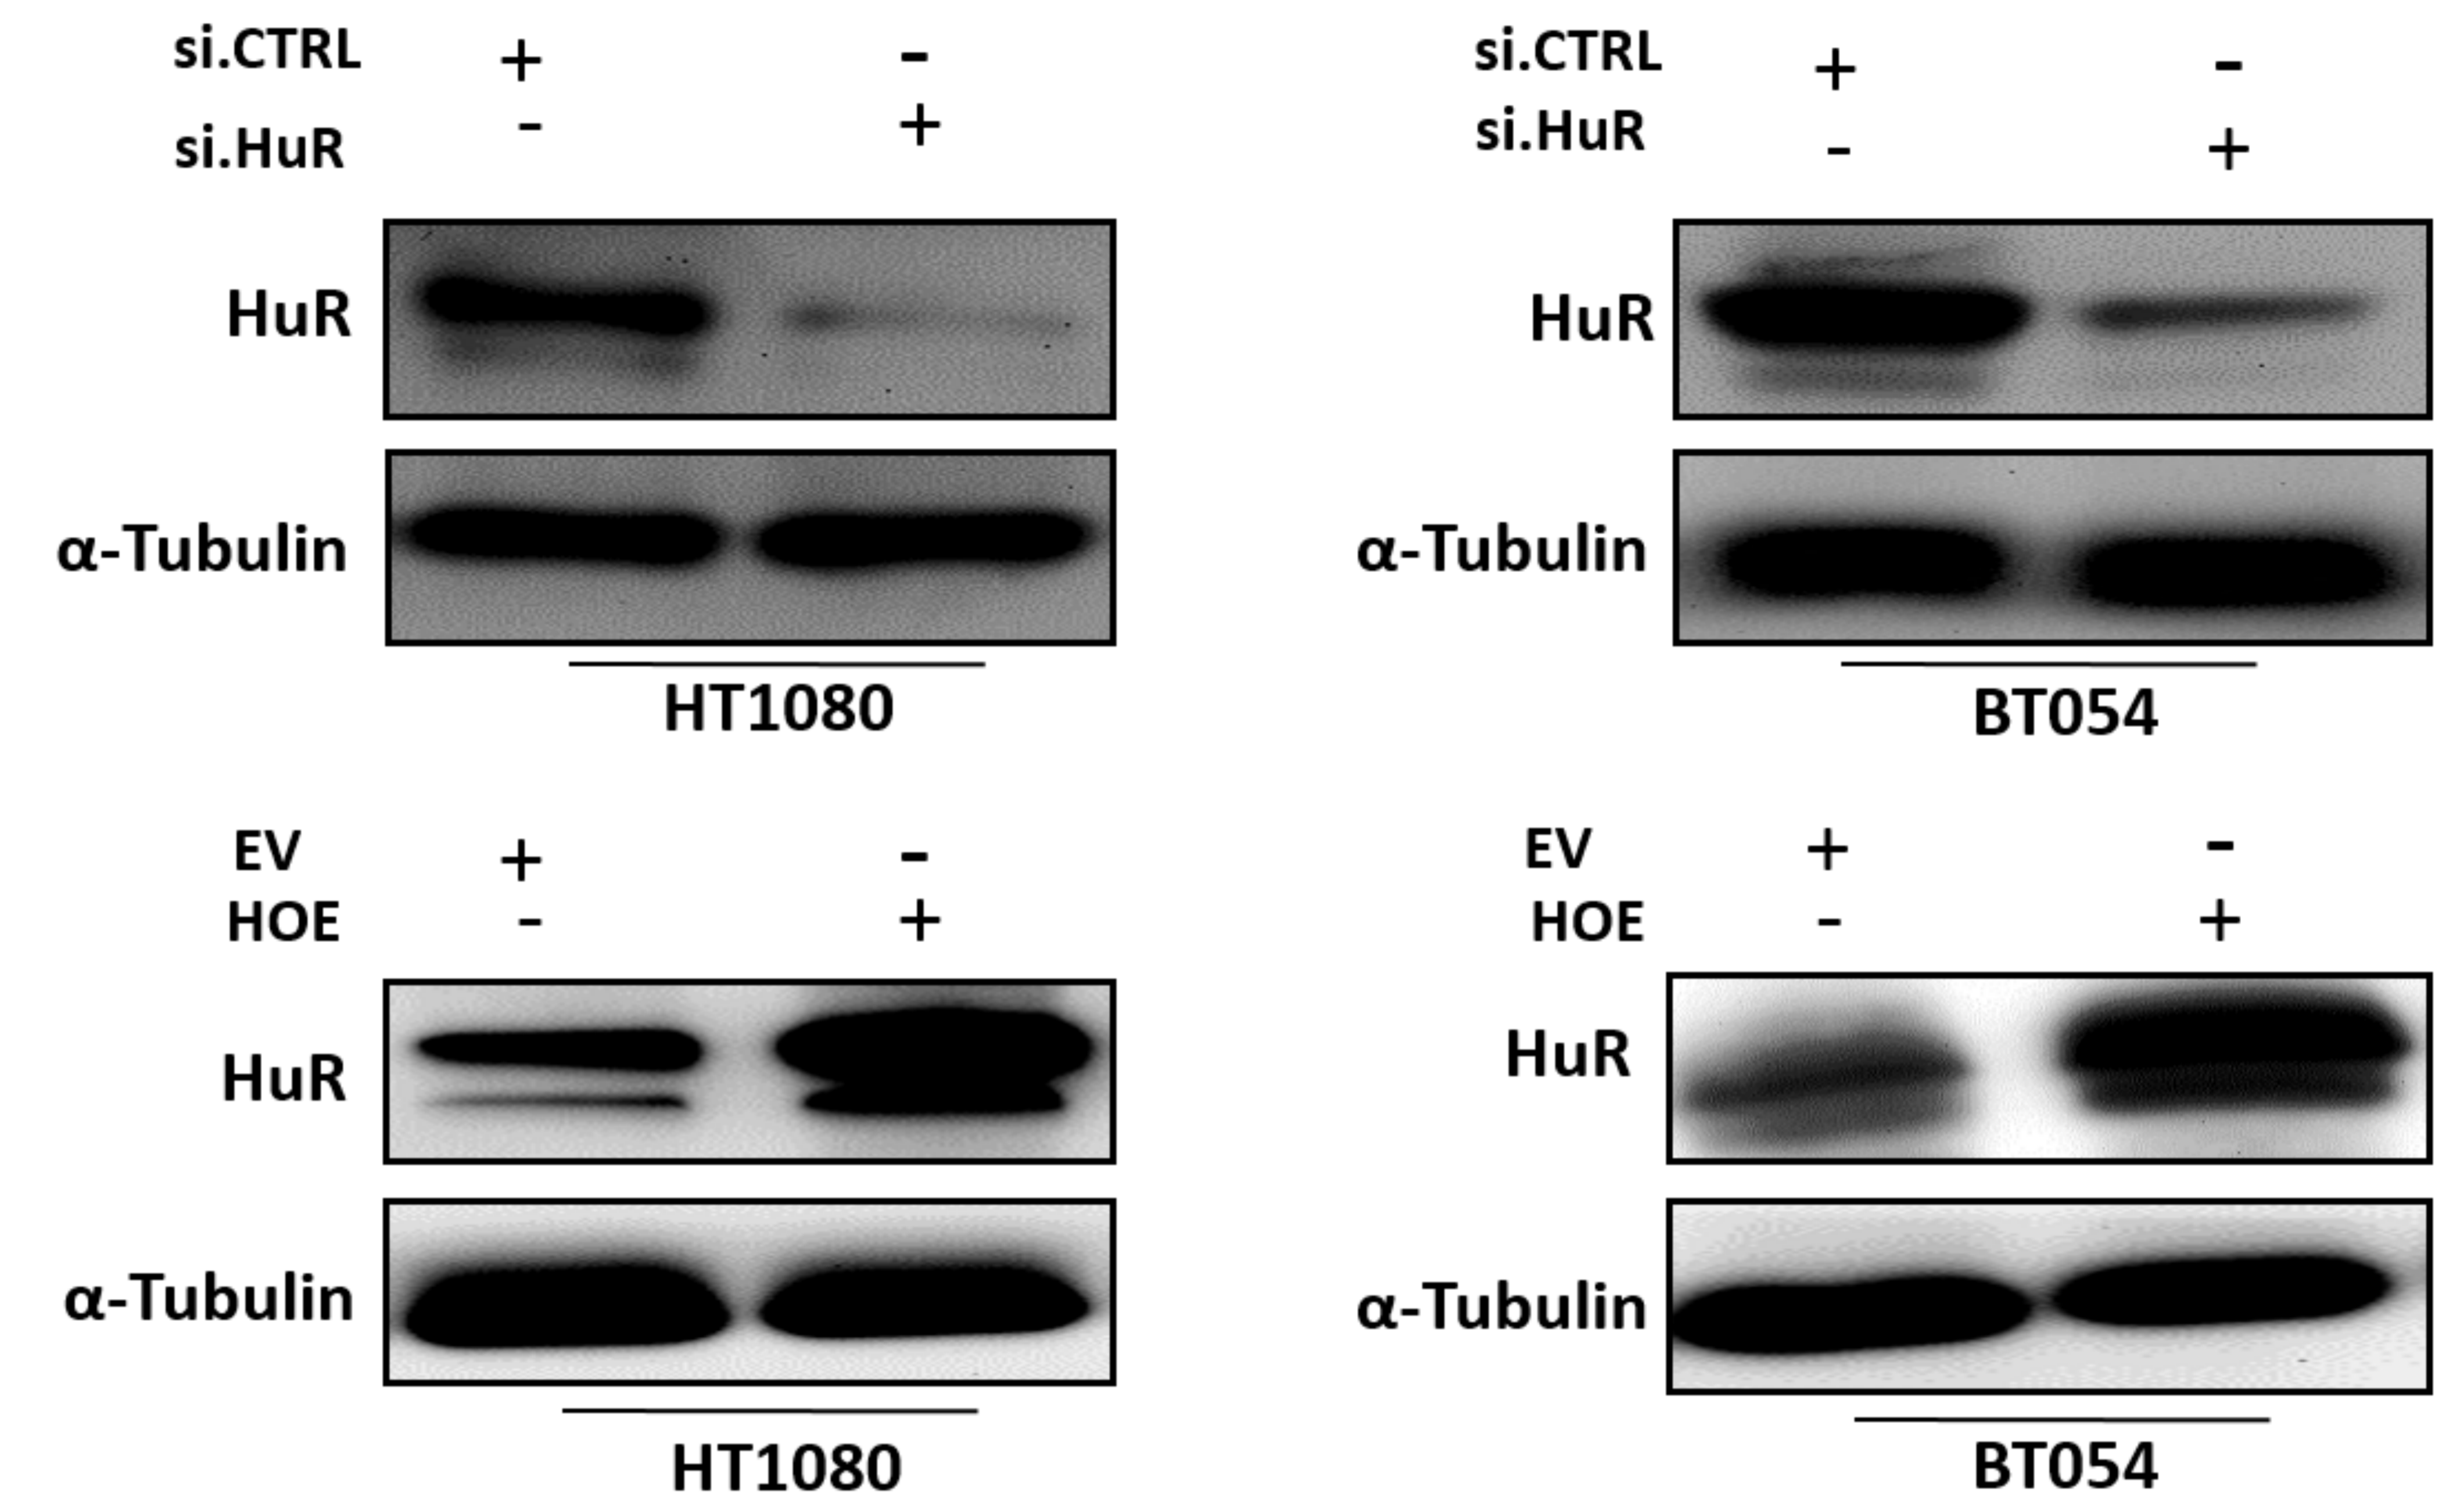

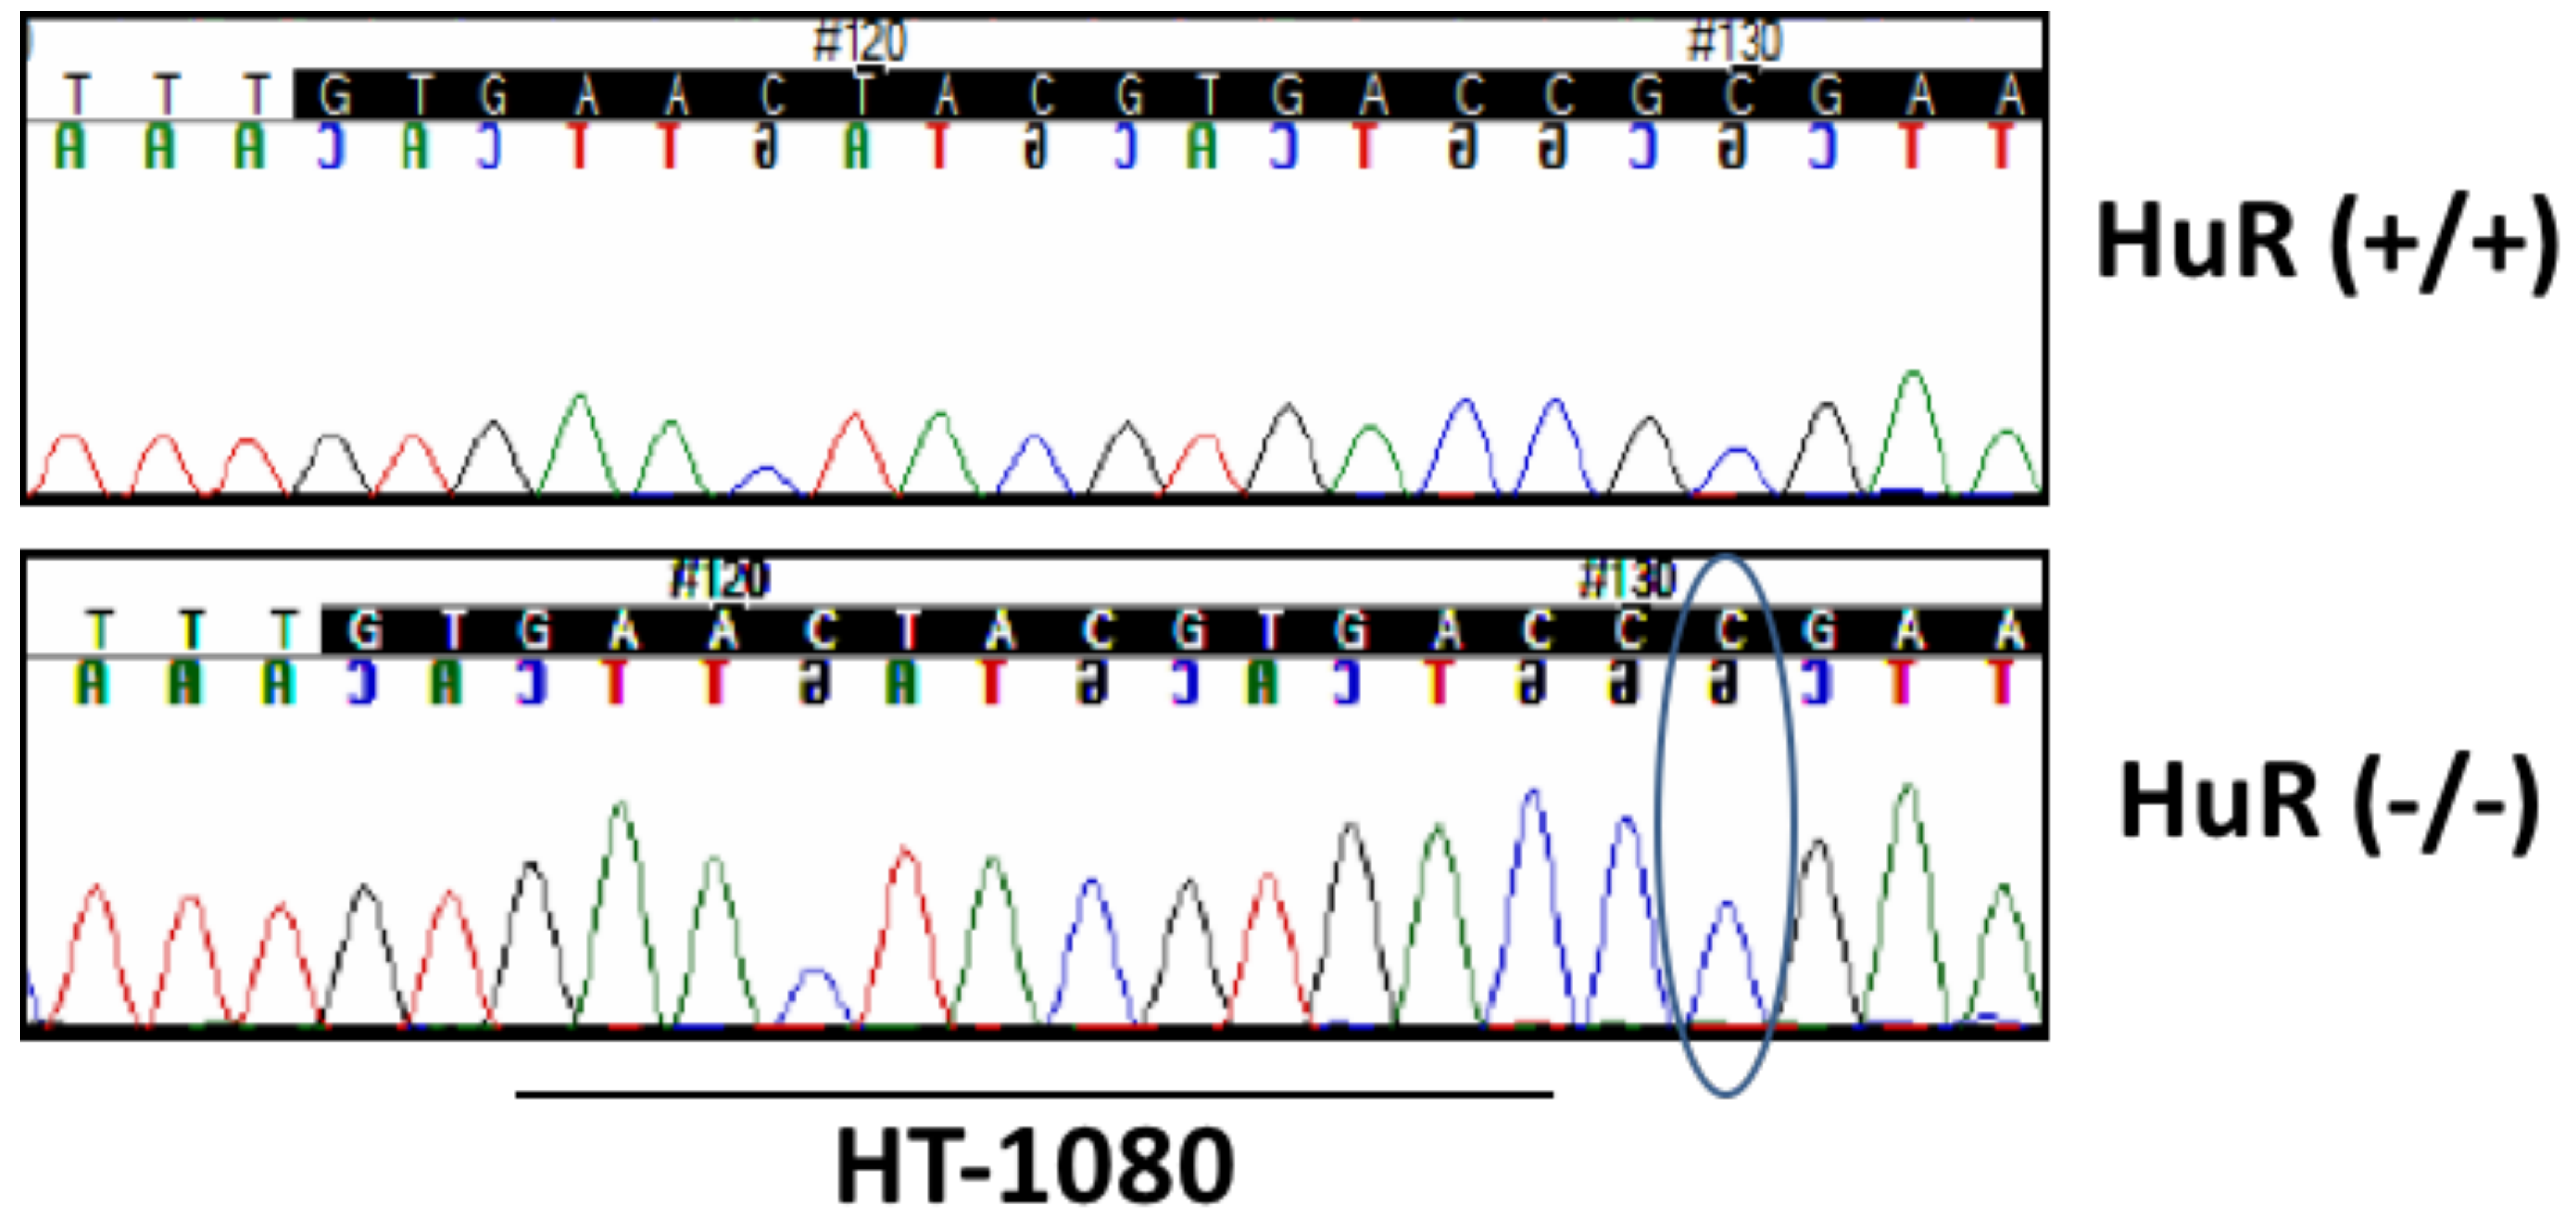

Sup-Figure 2

**A**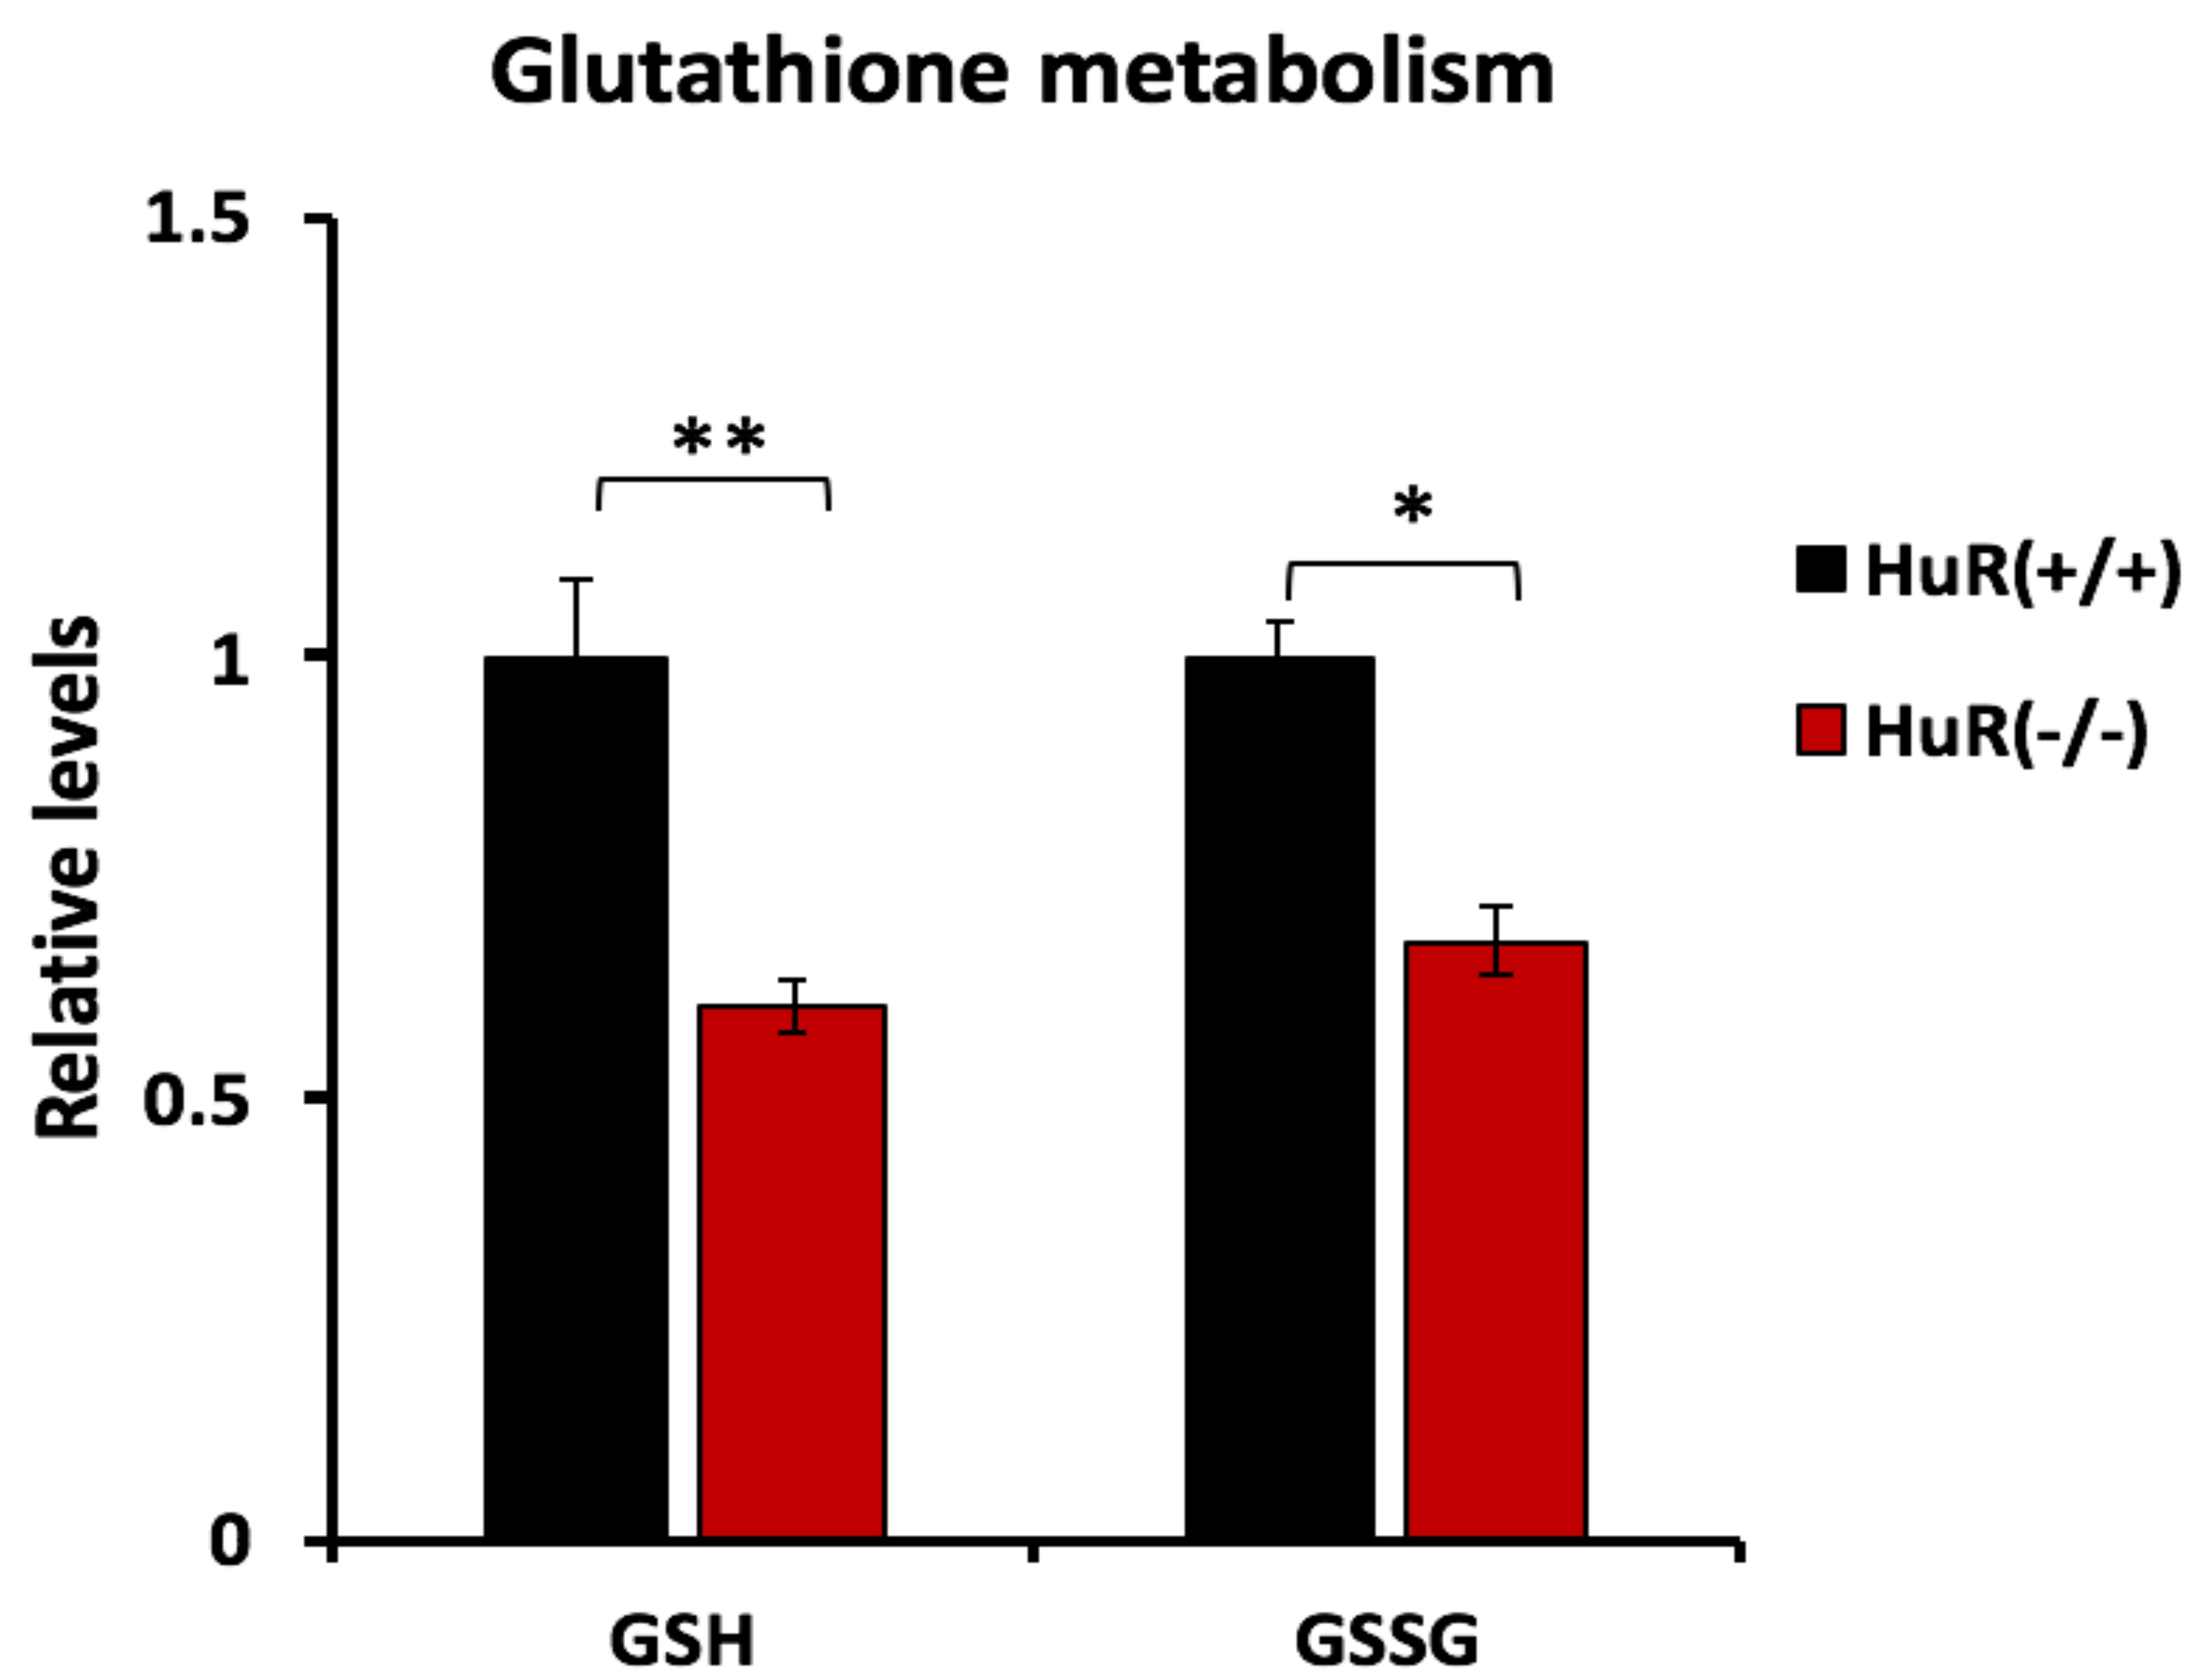**B**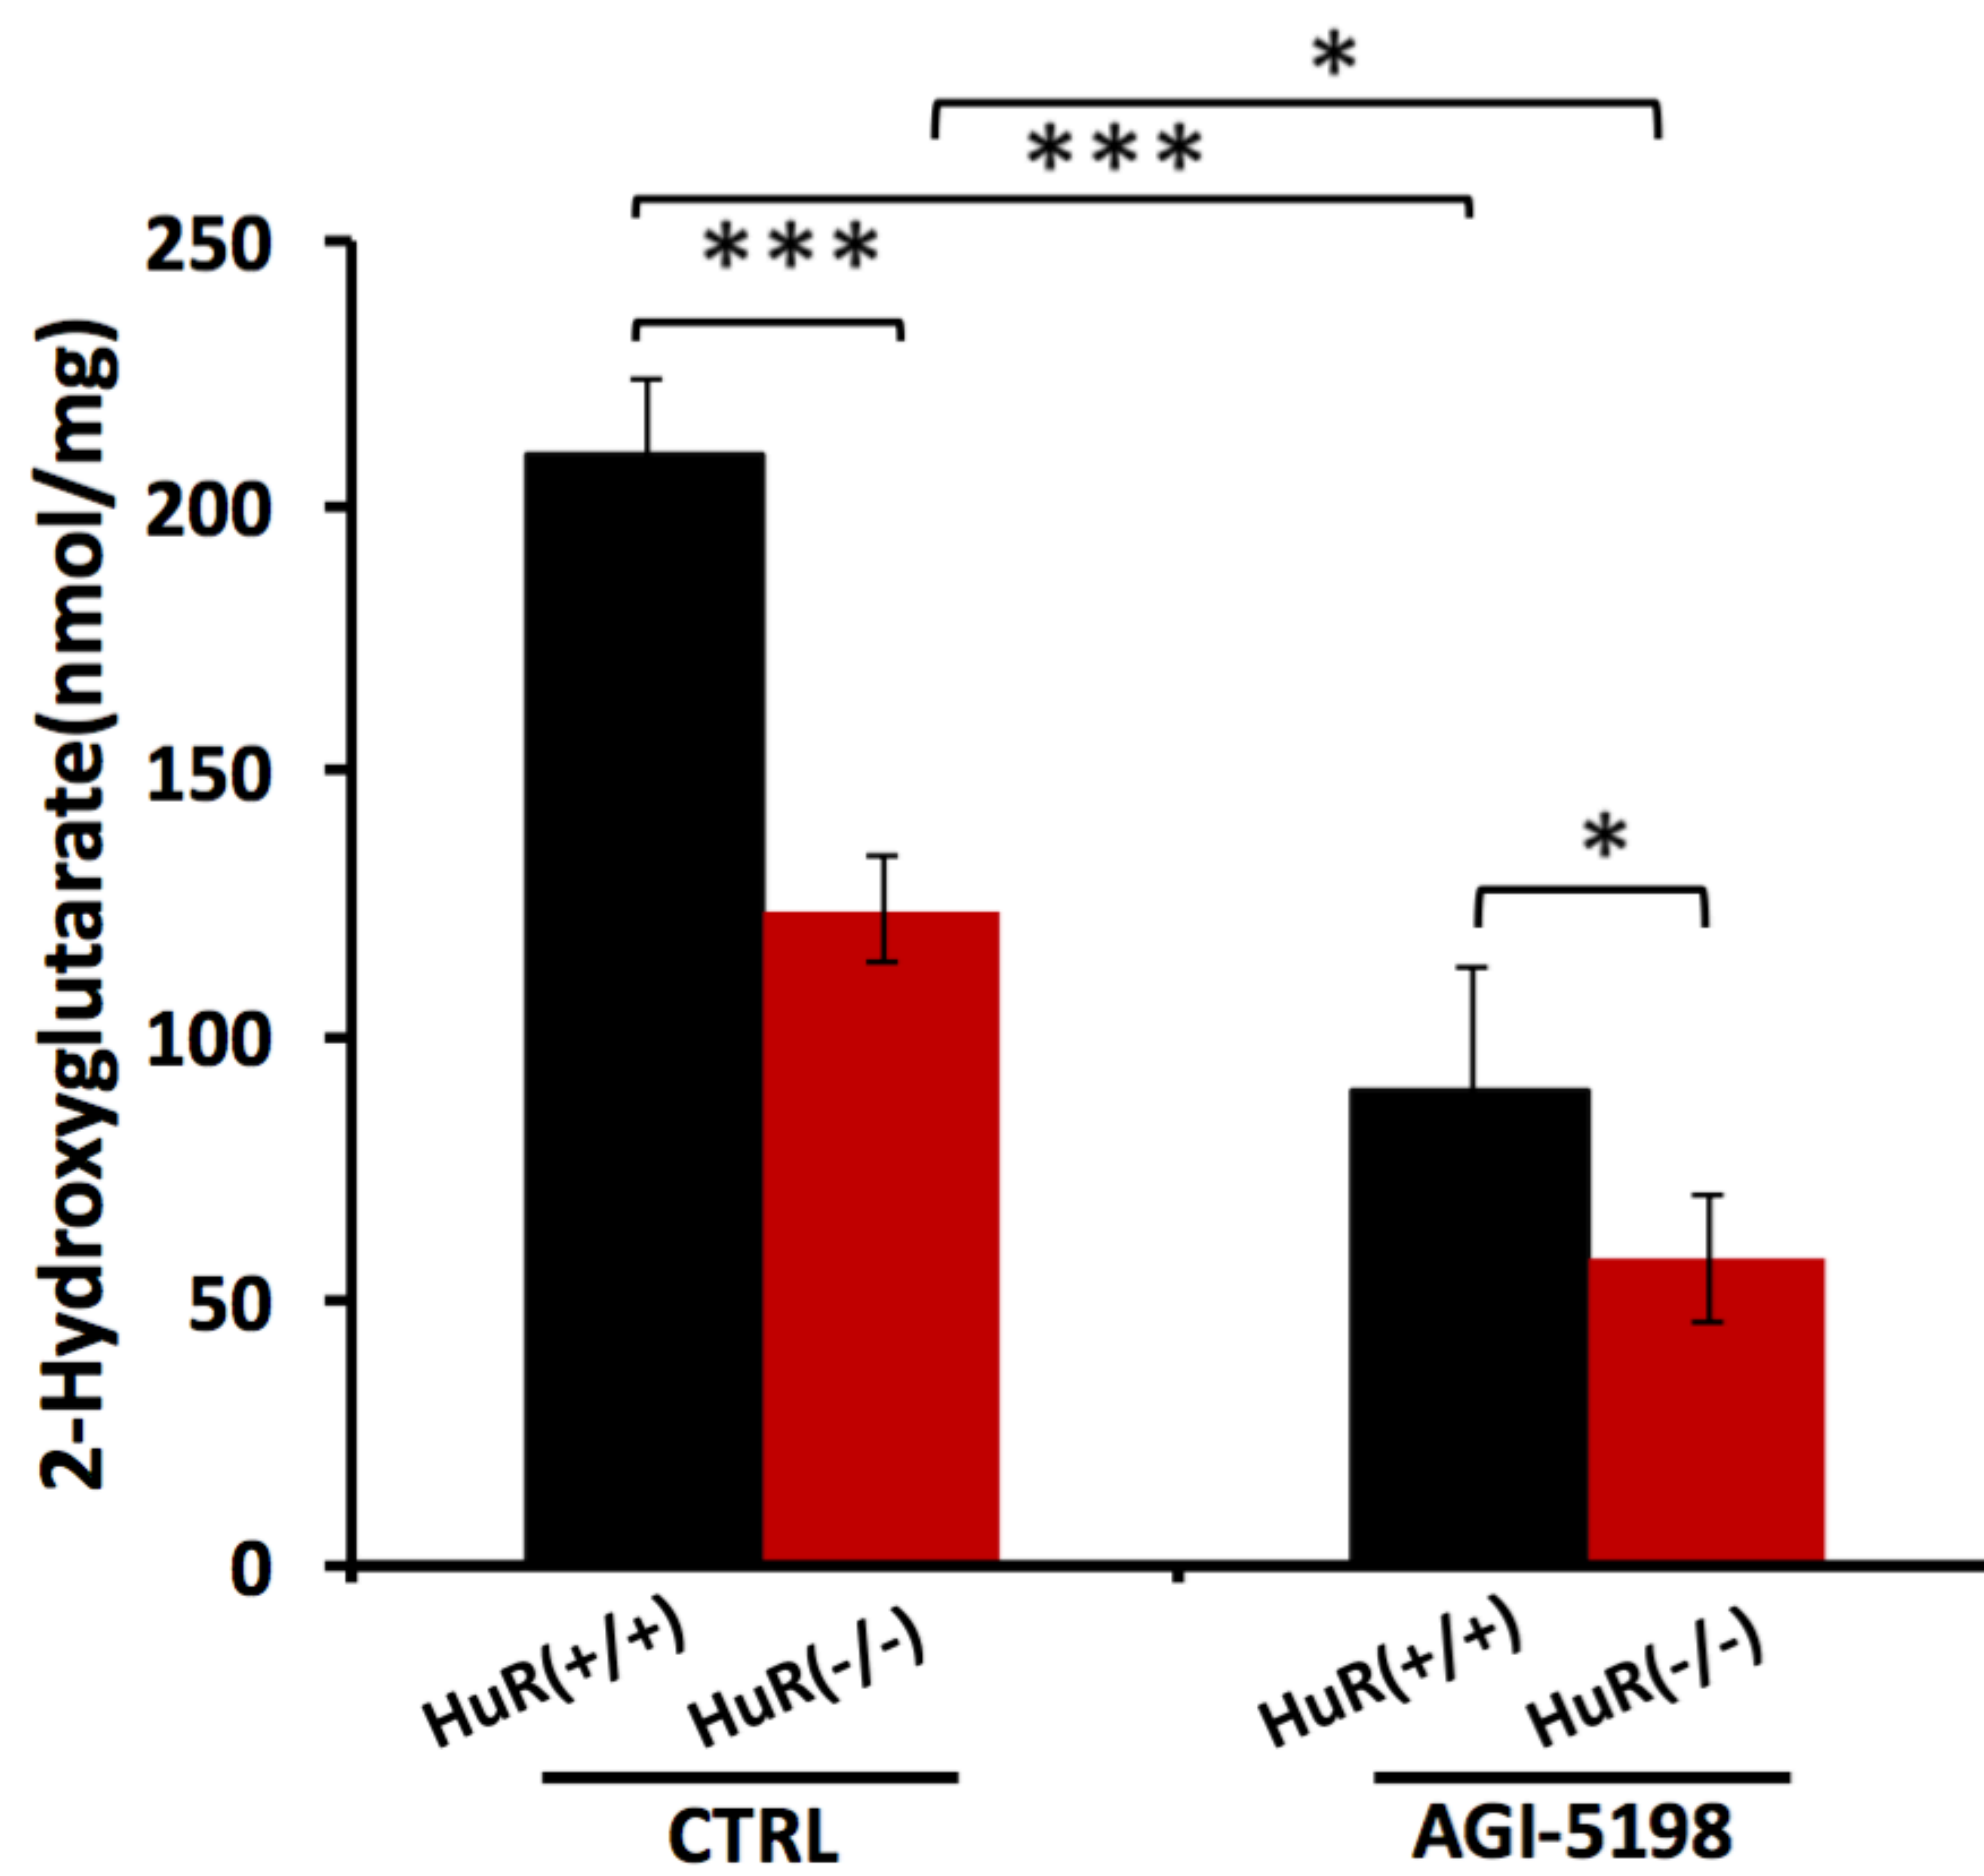

**A**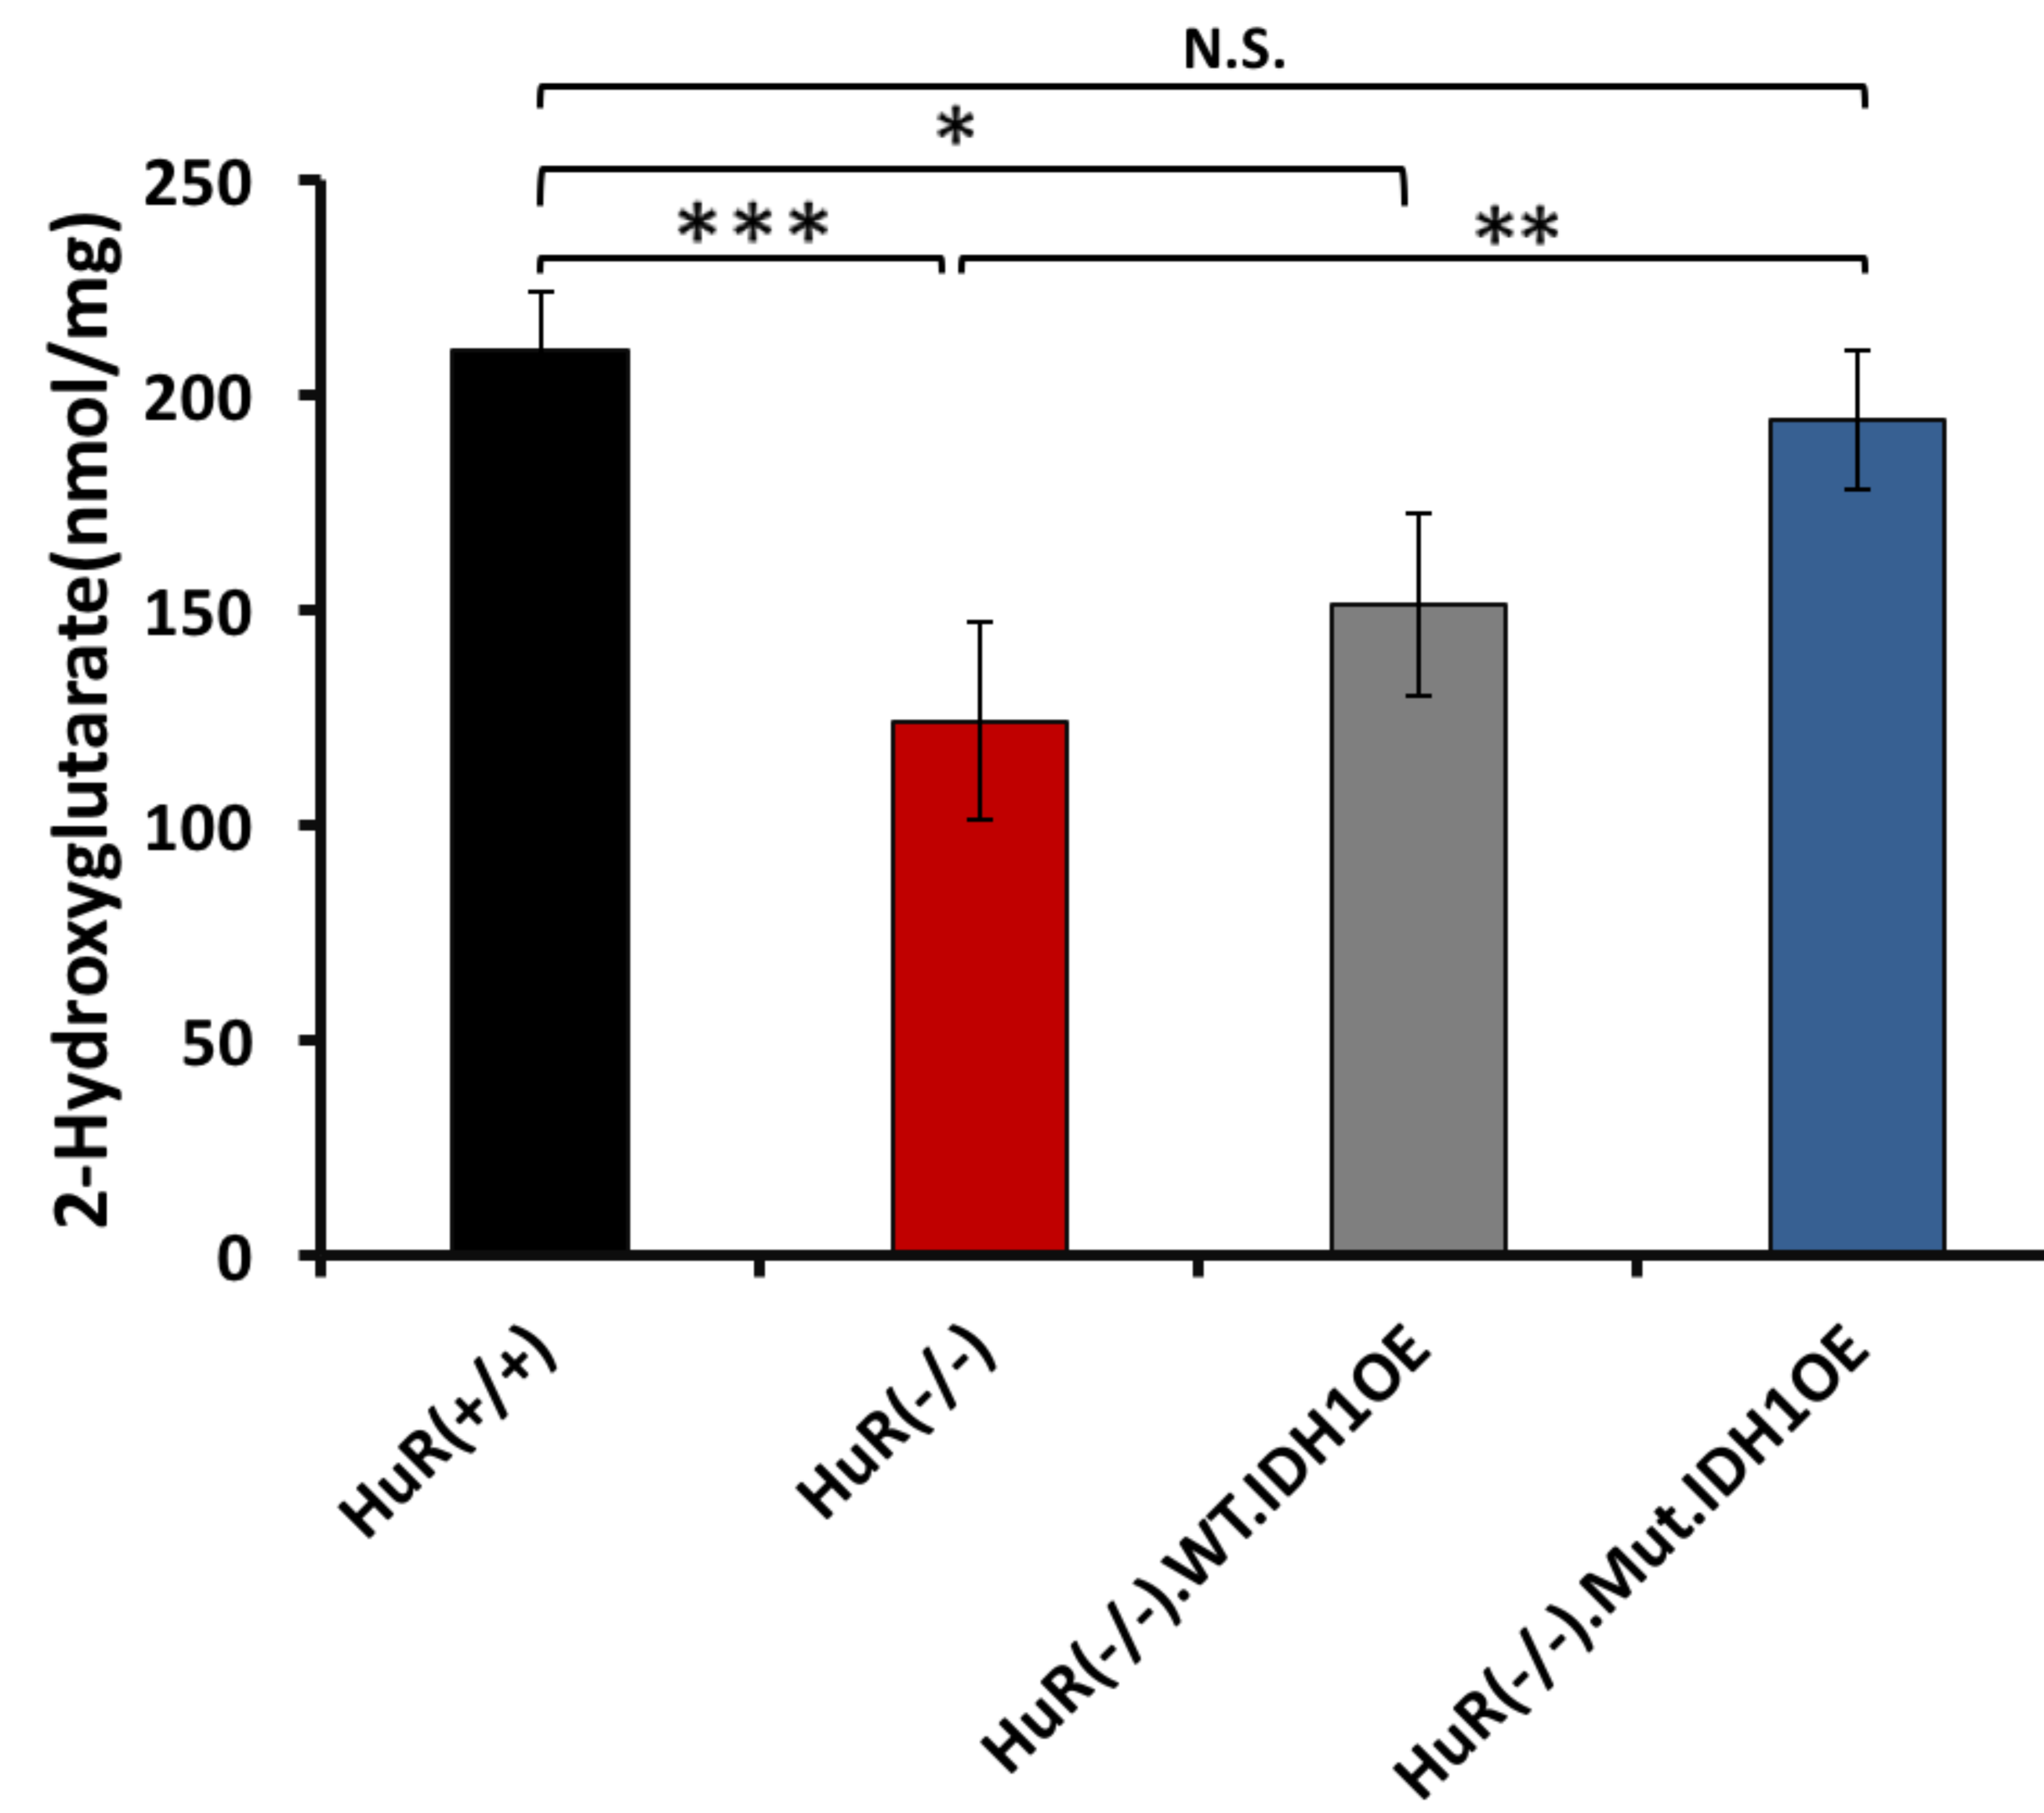**B**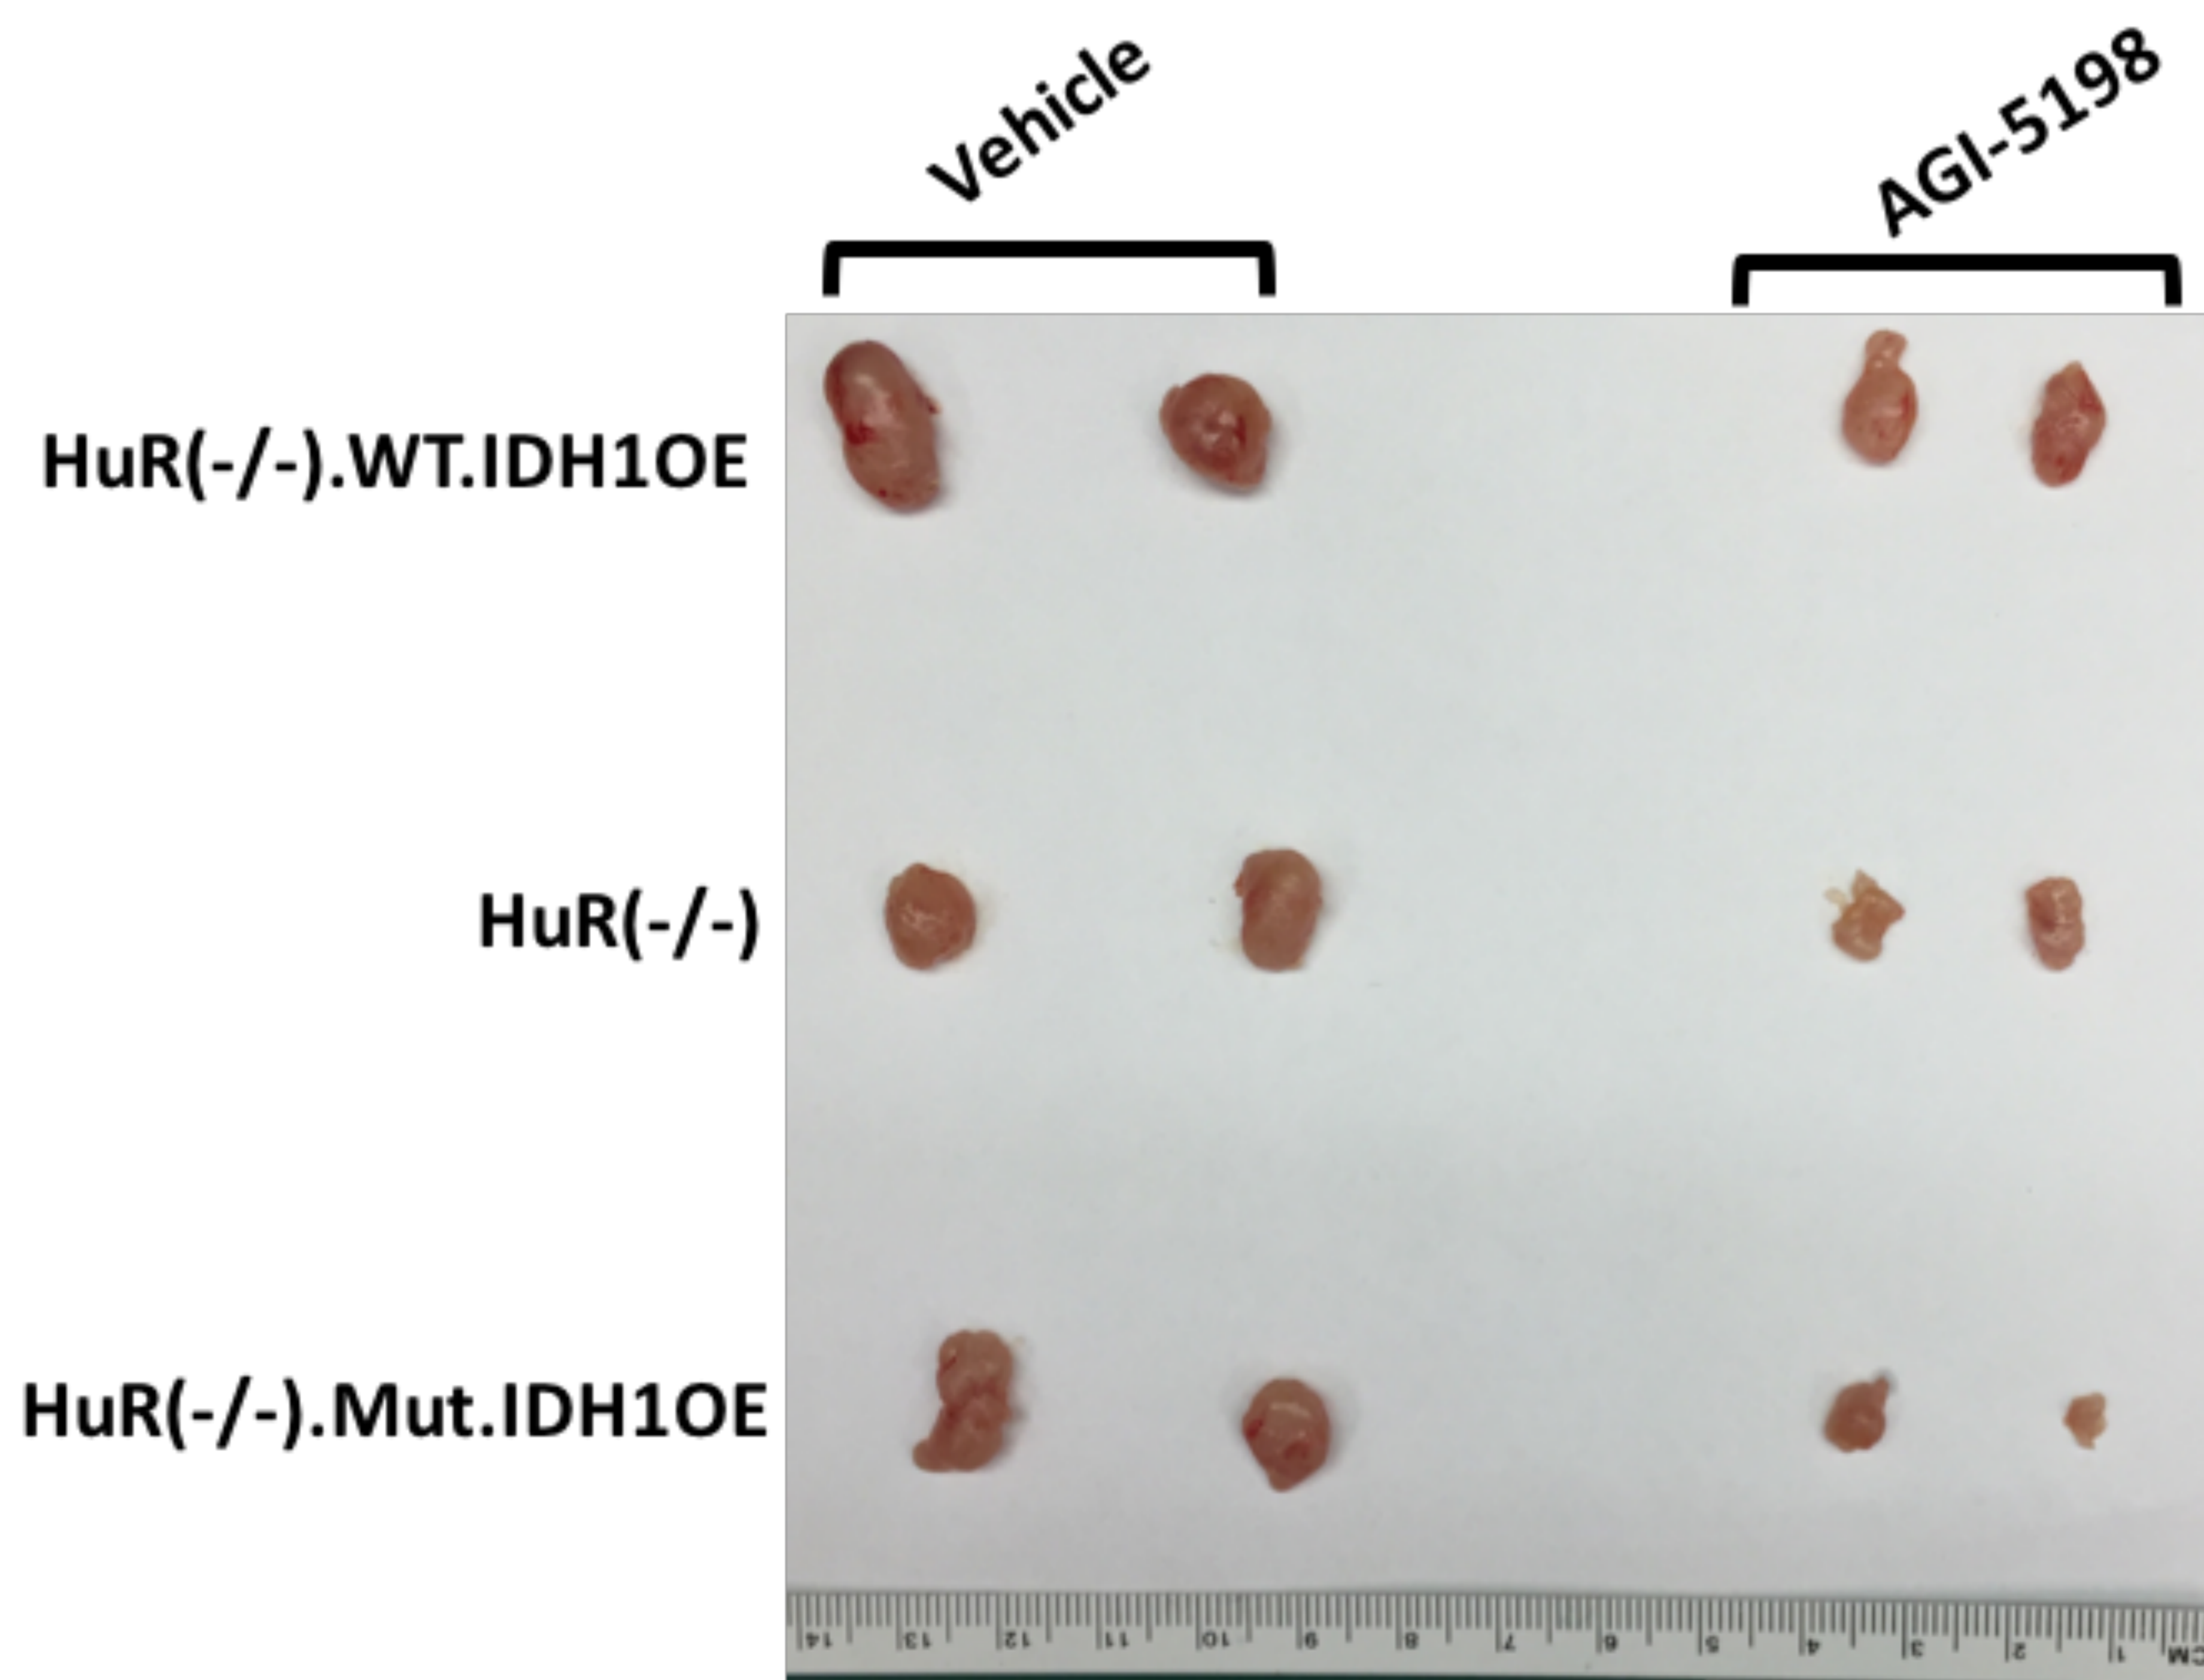**C**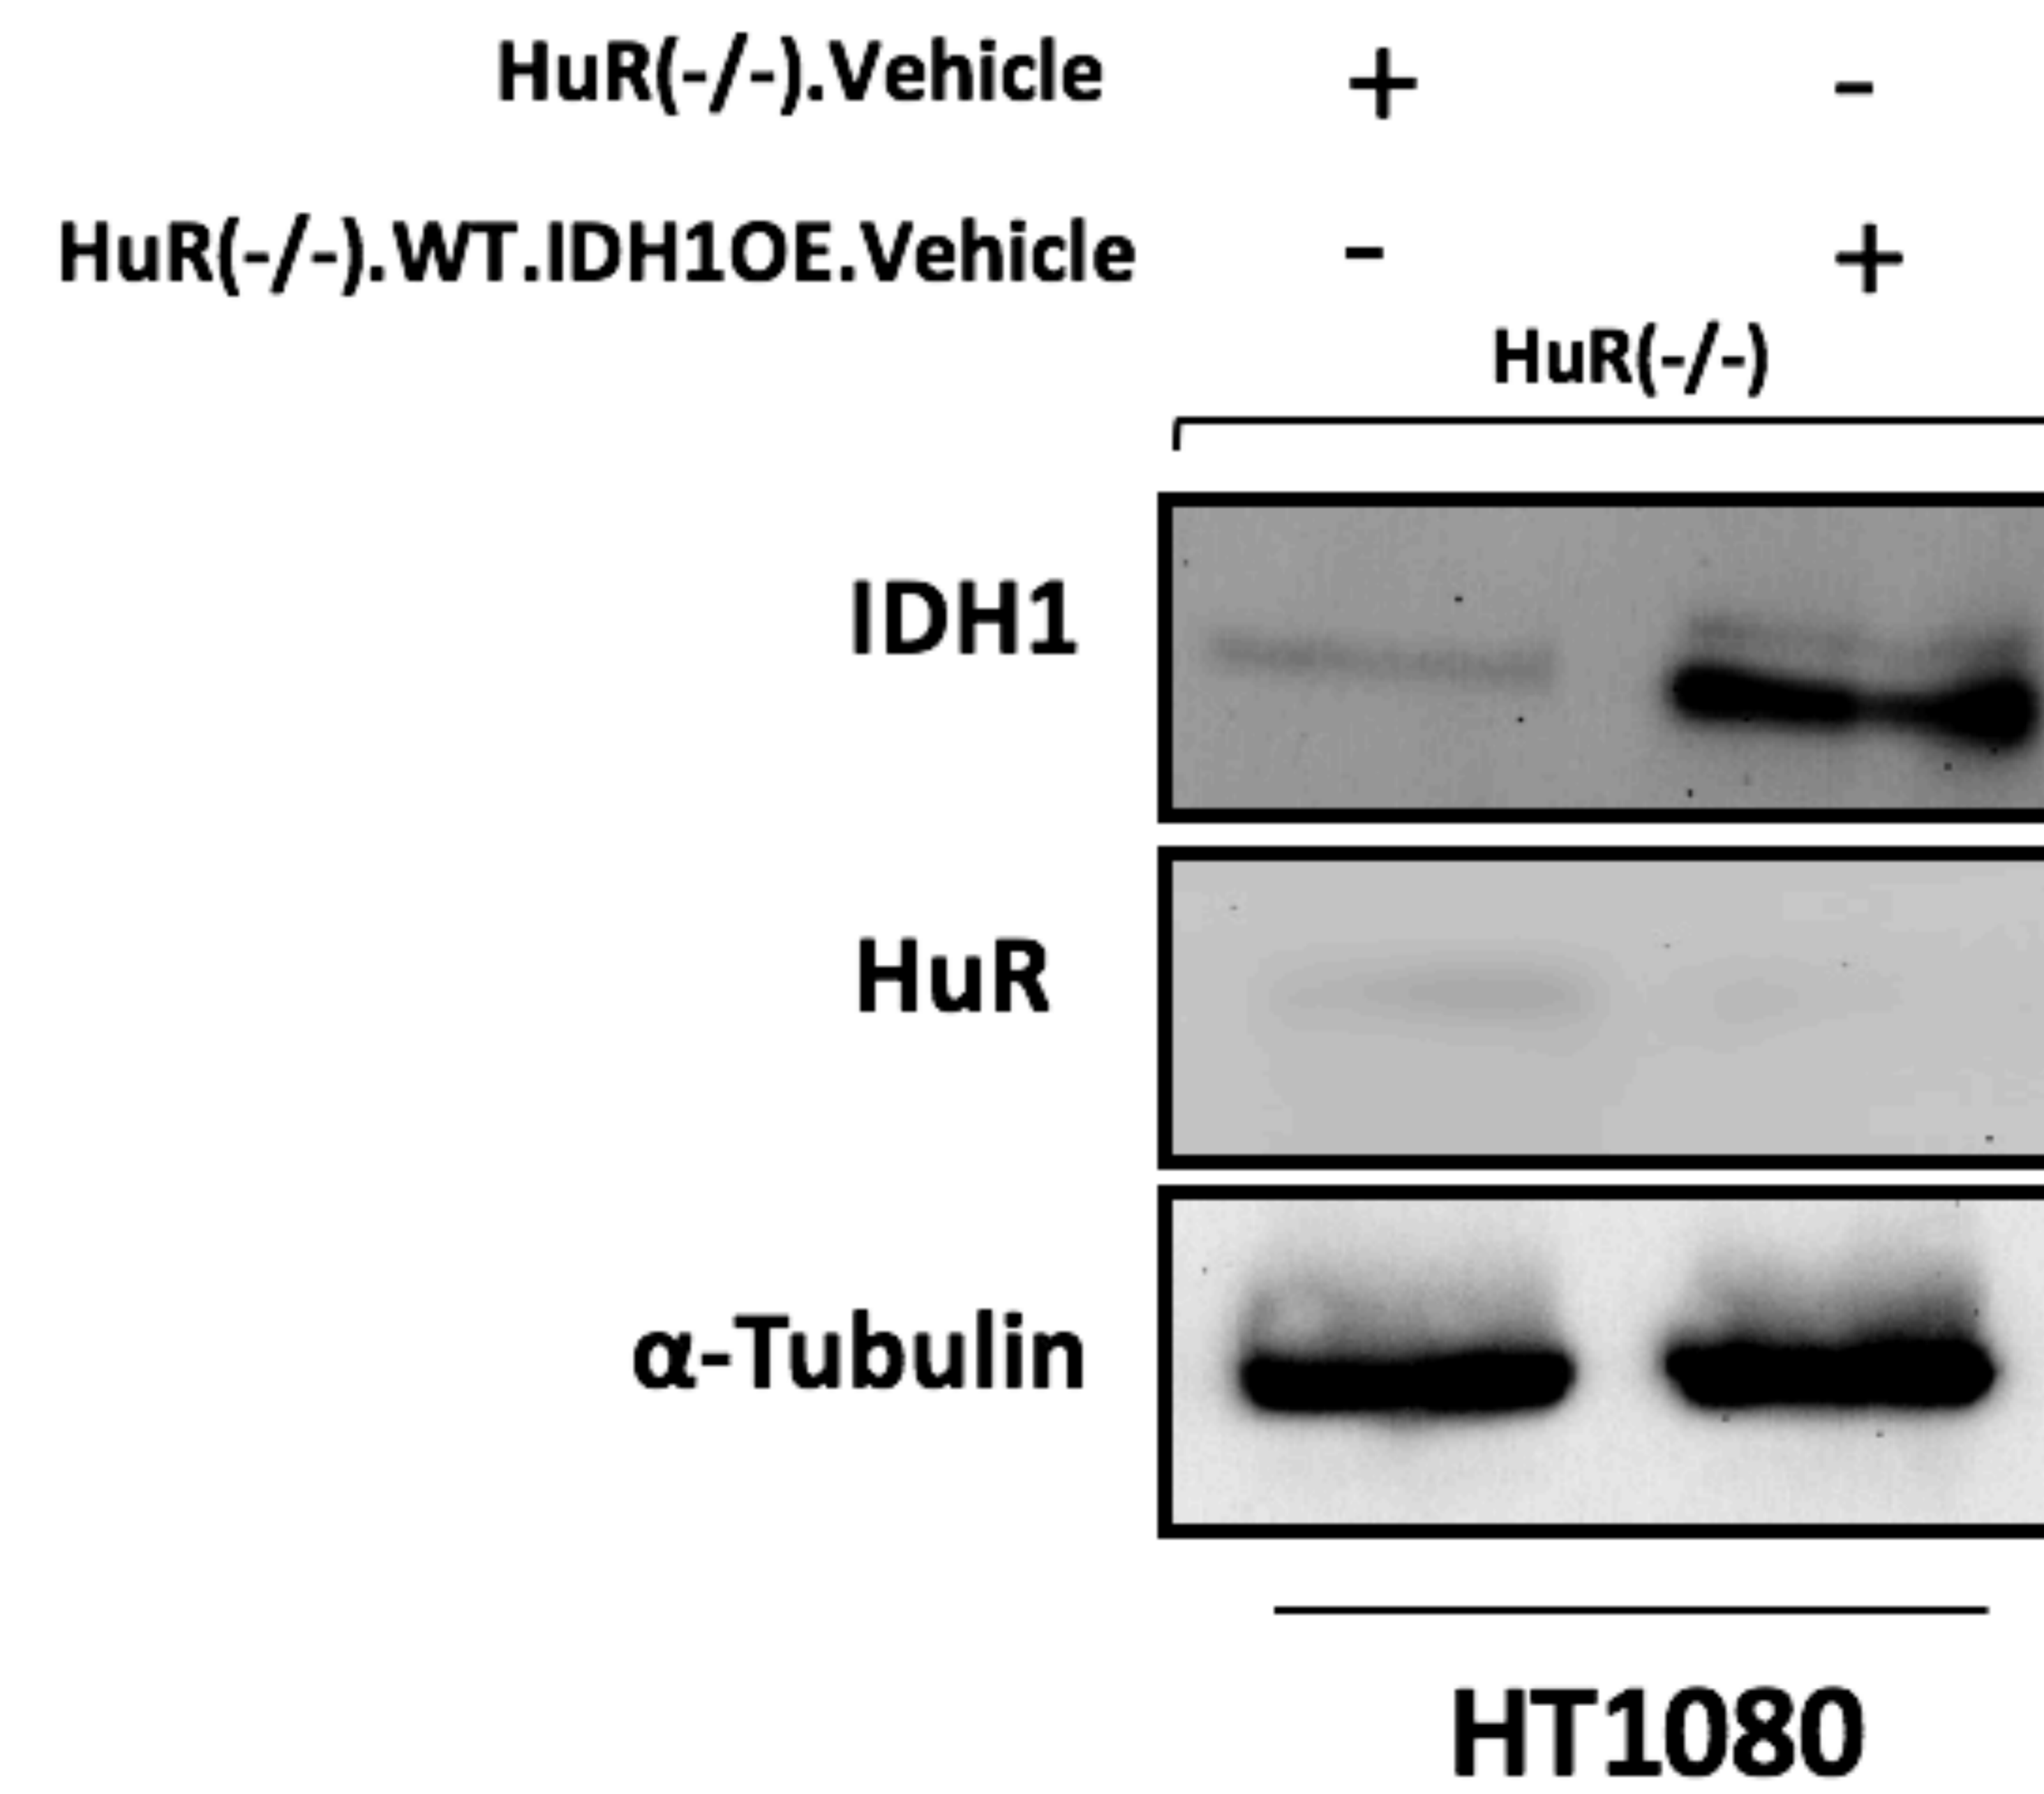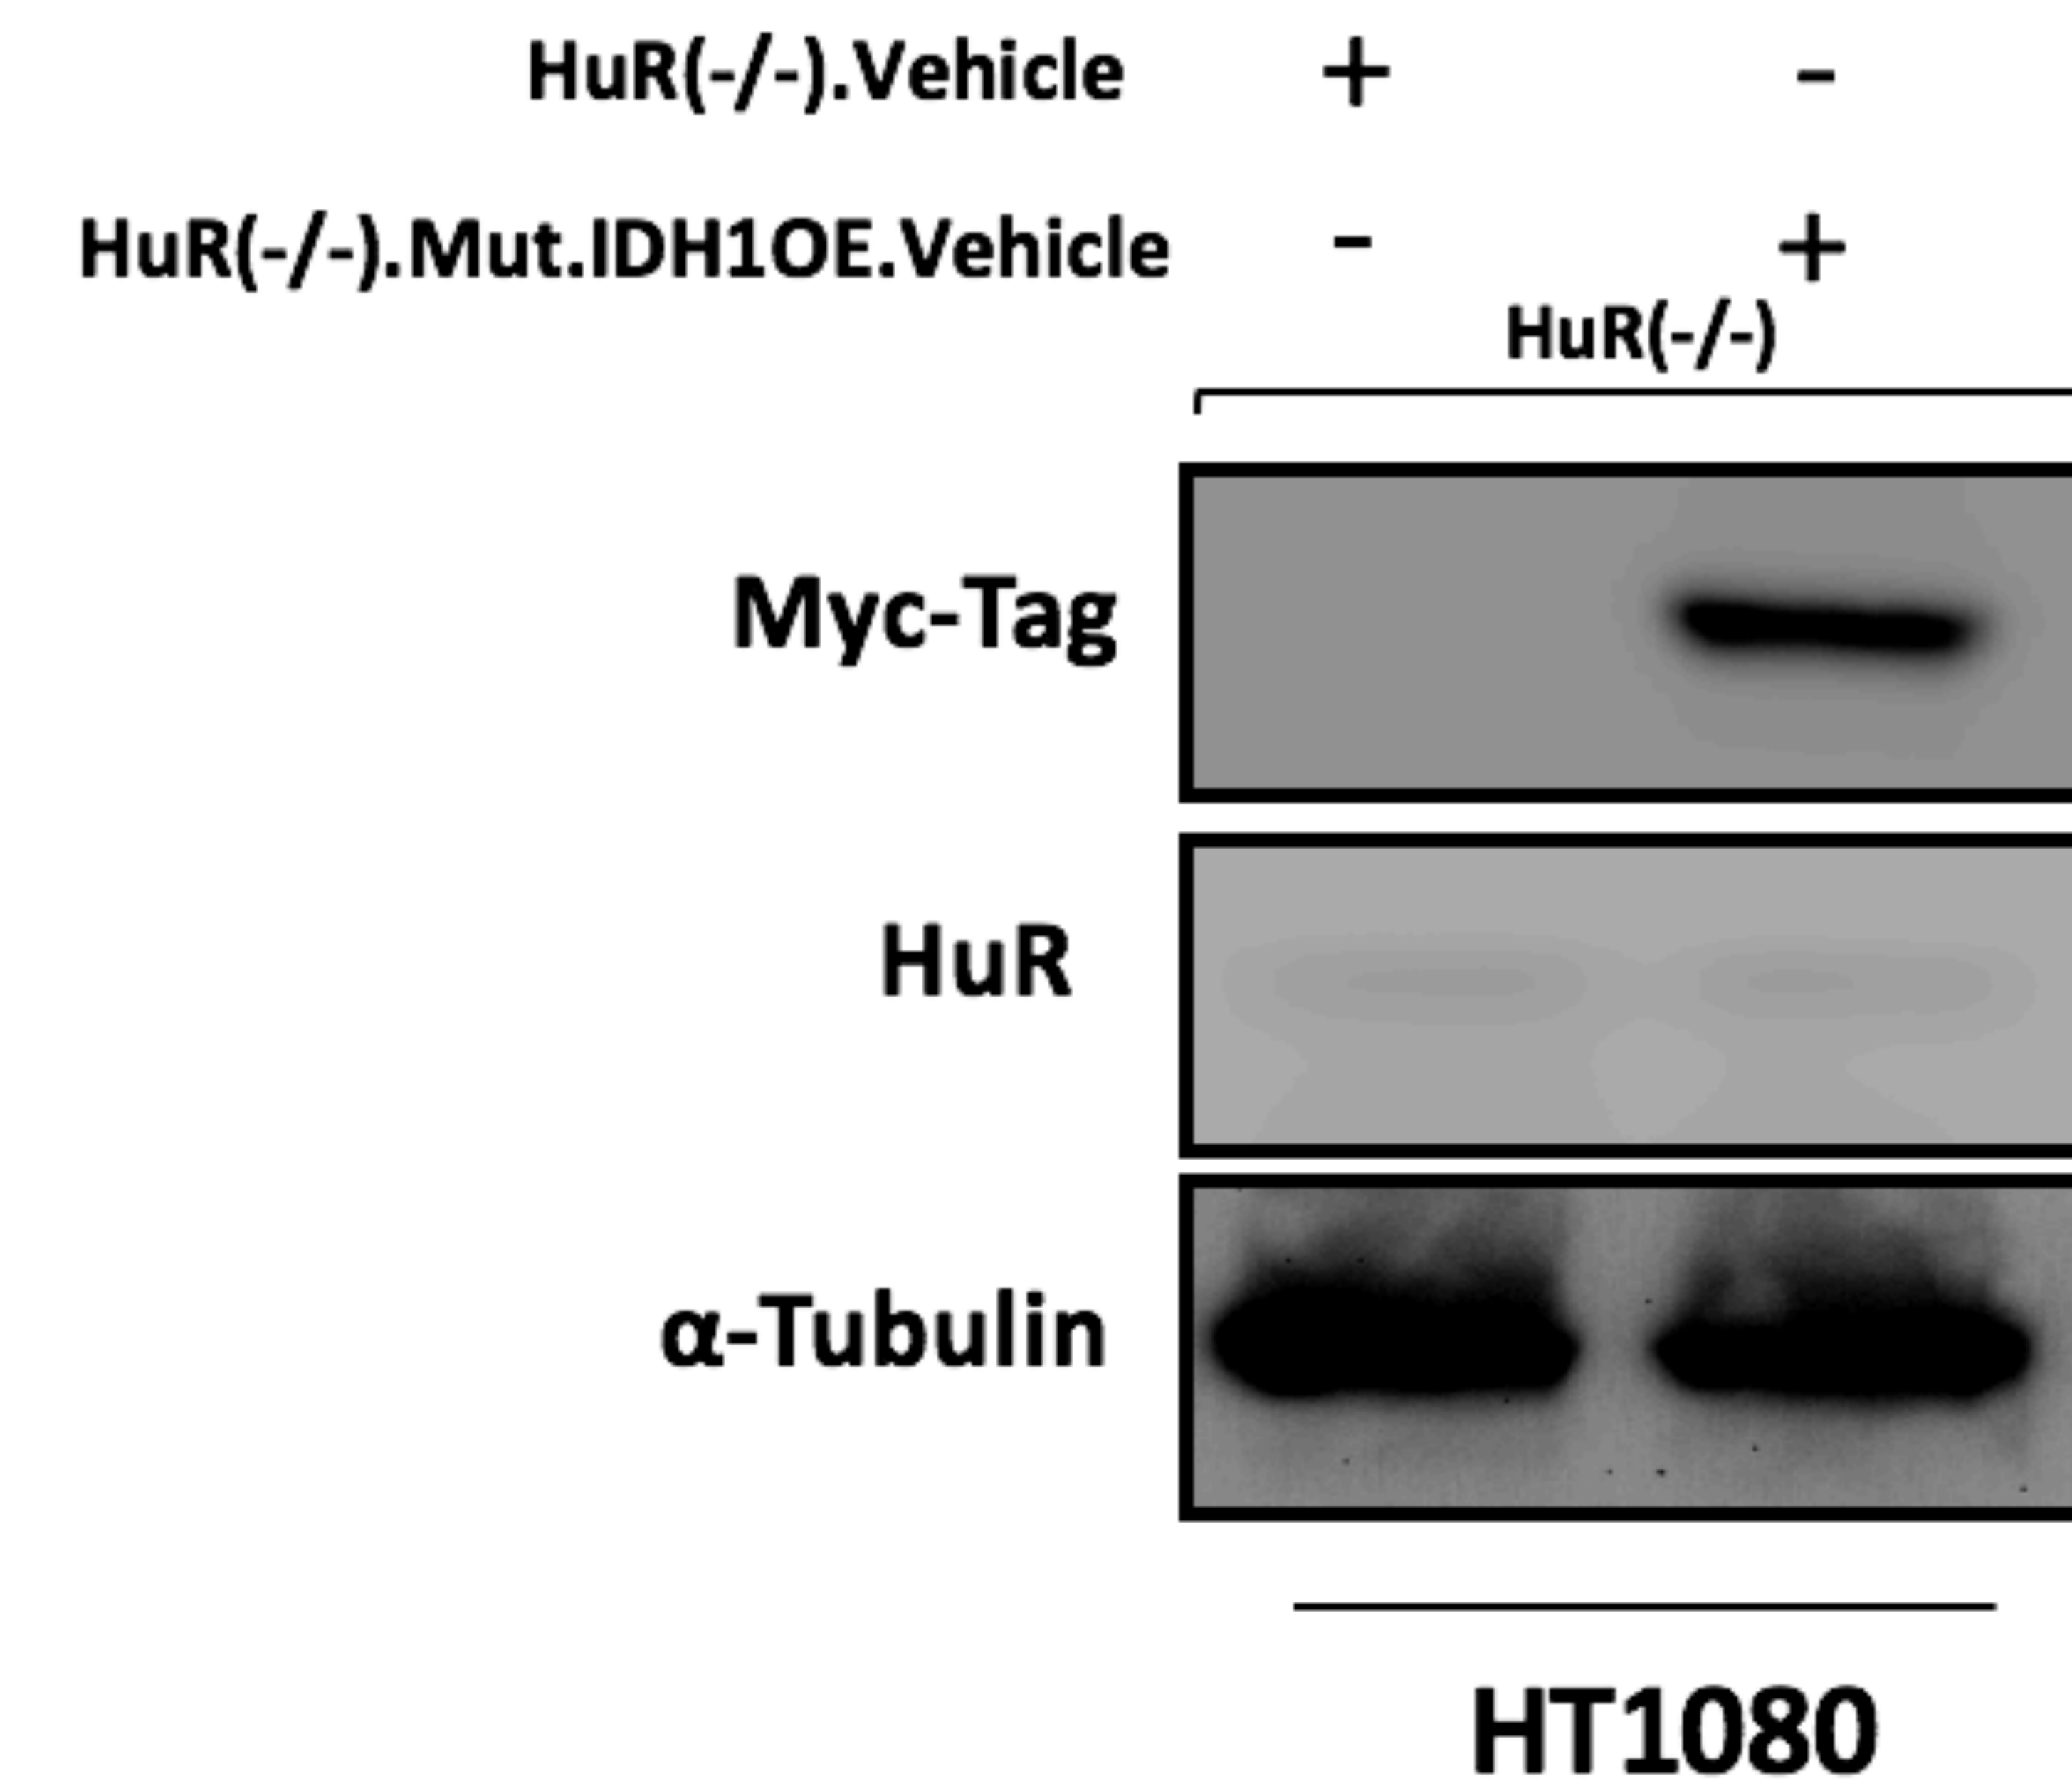

Supplement: NIHMS1507357-supplement-2.pdf [file NIHMS1507357-supplement-2.pdf]
